# Supplementary material for: Comparison of the Effect of Endurance, Strength, and Endurance-Strength Training on Inflammatory Markers and Adipokines Levels in Overweight and Obese Adults: Systematic Review and Meta-Analysis of Randomised Trials
Source: Healthcare (Basel). 2022 Jun 13;10(6):1098. doi: 10.3390/healthcare10061098 (PMC9222976; doi:10.3390/healthcare10061098)
Supplement: Supplementary file 1 [file healthcare-10-01098-s001.zip]

Archive with 7 entries (7 files):
- Figure S1.png
- Figure S2.png
- Figure S3.png
- Figure S4.png
- Figure S5.png
- PRISMA_2020_abstract_checklist.pdf
- PRISMA_2020_checklist.pdf
